# Supplementary material
Source: Elsevier journal article supplement (https://orbi.uliege.be/bitstream/2268/296803/3/mmc1.docx)
Supplement: mmc1 [file mmc1.docx]

**Electronic Supplementary Material Figures S1-S10 and Table S1**

Spatial and temporal variations of dissolved CO2, CH4 and N2O in Lakes Edward and George (East Africa).

Alberto V. Borges1, William Okello2, Steven Bouillon3, Loris Deirmendjian1, Angela Nankabirwa2, Erina Nabafu2, T. Lambert1, Jean-Pierre Descy1, Cédric Morana1,3

1 Chemical Oceanography Unit, University of Liège, Liège, Belgium

2 National Fisheries Resource Research Institute, Jinja, Uganda

3 Department of Earth and Environmental Sciences, KU Leuven, Leuven, Belgium

**Supplemental Figure S1:** Air temperature (°C), relative humidity (%), precipitation (mm), wind speed (m s-1) in Mweya (-0.1904°N 29.8991°E) from January 2016 to late March 2019. Vertical lines indicate the periods of the sampling cruises.

**Supplemental Figure S2:** Water temperature (°C), specific (Sp.) conductivity (µS cm-1) and oxygen saturation levels (%O2) in Lake Edward reported in 1935 by Damas (1937), 1931 by Beadle (1932), 1964 by Beadle (1966), 2018 (this study).

**Supplemental Figure S3:** Vertical profiles of specific (Sp.) conductivity (µS cm-1) in Lake Edward (32 m bottom depth) in October 2016 (25/10/2016 at 13:10 local time (LT)), March 2017 (25/03/2017 at 09:20 LT), January 2018 (19/01/2018 at 11:55 LT), March 2019 (30/03/2019 at 10:00 LT).

**Supplemental Figure S4:** Wind speed (m s-1) and air temperature (°C), in Mweya (-0.1904°N 29.8991°E) from March 25 to April 1 2017. Vertical dotted lines indicate the sampled profiles shown in figure 11. Arrow indicates a storm on March 30.

**Supplemental Figure S5:** Vertical profiles of specific (Sp.) conductivity (µS cm-1) in Lake Edward (32 m bottom depth) in 26/03/2017 (11:00 local time (LT)), 27/03/2017 (09:35 LT), 30/03/2017 (12:55 LT) and 31/03/2017 (14:40 LT).

**Supplemental Figure S6:** CH4 concentration (nmol L-1) versus carbon stable isotopic composition of CH4 (δ13C-CH4, ‰) in surface waters of Lake Edward in March 2017. Vertical dotted line indicates the lowest δ13C-CH4 measured in bottom waters during this sampling cruise. Arrow indicates a particularly elevated CH4 concentration measured at a station with a bottom depth of 22 m on March 30.

**Supplemental Figure S7:** Wind speed (m s-1) and air temperature (°C), in Mweya (-0.1904°N 29.8991°E) from October 21 to November 4, 2016. Vertical dotted lines indicate the sampled profiles shown in Figure 13. Horizontal double arrow indicates 3 consecutive days of windy conditions, and vertical arrow indicates a cooling prior to sampling on November 4.

**Supplemental Figure S8:** N2O concentration as a function of specific (Sp.) conductivity (µS cm-1) in Lake Edward in surface waters (station with bottom depth of 22 m) on November 4 (after a storm event) and before the storm event in bottom waters (20 m and 30m) at two stations sampled on October 22 (station with bottom depth of 22 m) and on 25 October (station with bottom depth of 32 m)

**Supplemental Figure S9:** Vertical water temperature variations at a station (-0.2459°N 29.8635°E) in Lake Edward (bottom depth of 10 m) from 21/03/2019 (13:00 local time (LT)) to 23/03/2019 (13:50 LT).

**Supplemental Figure S10:** O2 saturation level (%O2, %) in bottom waters (sampled at 20 m depth) versus potential energy anomaly (PEA, J m-3) in Lake Edward, at a station with bottom depth of 22m, from January 2017 to December 2019.

**Supplemental Table S1:** Date and time (local time (LT)) of sampling at the monitoring station (22 m depth) in Lake Edward (Fig. 14).

| **DD-MM-YYYY hh:mm (LT)** |
| --- |
| 30-12-2016 12:04 |
| 23-01-2017 11:40 |
| 19-02-2017 10:38 |
| 12-03-2017 16:40 |
| 26-03-2017 11:00 |
| 25-04-2017 14:35 |
| 16-05-2017 17:44 |
| 05-06-2017 16:41 |
| 21-06-2017 15:57 |
| 10-07-2017 13:49 |
| 31-07-2017 13:56 |
| 22-08-2017 10:26 |
| 16-09-2017 09:43 |
| 04-10-2017 11:39 |
| 24-10-2017 11:31 |
| 13-11-2017 10:01 |
| 06-12-2017 10:53 |
| 28-12-2017 10:51 |
| 21-01-2018 11:30 |
| 25-02-2018 11:03 |
| 21-03-2018 12:55 |
| 17-04-2018 09:27 |
| 05-01-2018 13:09 |
| 24-05-2018 13:29 |
| 27-06-2018 13:36 |
| 30-07-2018 11:18 |
| 30-08-2018 09:55 |
| 30-09-2018 10:17 |
| 11-04-2018 10:10 |
| 30-11-2018 09:16 |
| 23-12-2018 08:37 |
| 30-01-2019 09:12 |
| 27-02-2019 07:39 |
| 23-03-2019 11:50 |
| 01-05-2019 13:29 |
| 28-05-2019 13:04 |
| 03-07-2019 09:16 |
| 29-07-2019 11:37 |
| 30-08-2019 09:32 |
| 21-09-2019 11:01 |
| 30-10-2019 09:13 |
| 29-11-2019 09:13 |
